# Supplementary material
Source: PubMed Central journal article supplement (PMC8765270)
Supplement: aac.01875-21-s0001.pdf [file aac.01875-21-s0001.pdf]

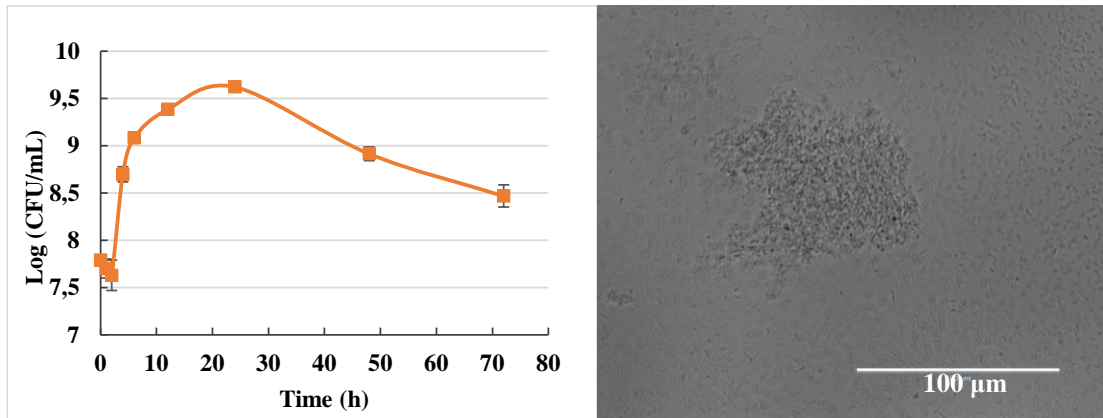

**Figure S1. Left: Growth curve of *P. aeruginosa* PAO1 in SCFM2. Error bars indicate the standard errors, n = 4. Right: 24 h old *P. aeruginosa* PAO1 aggregates observed under microscope.**

## Carbohydrates (n = 17)

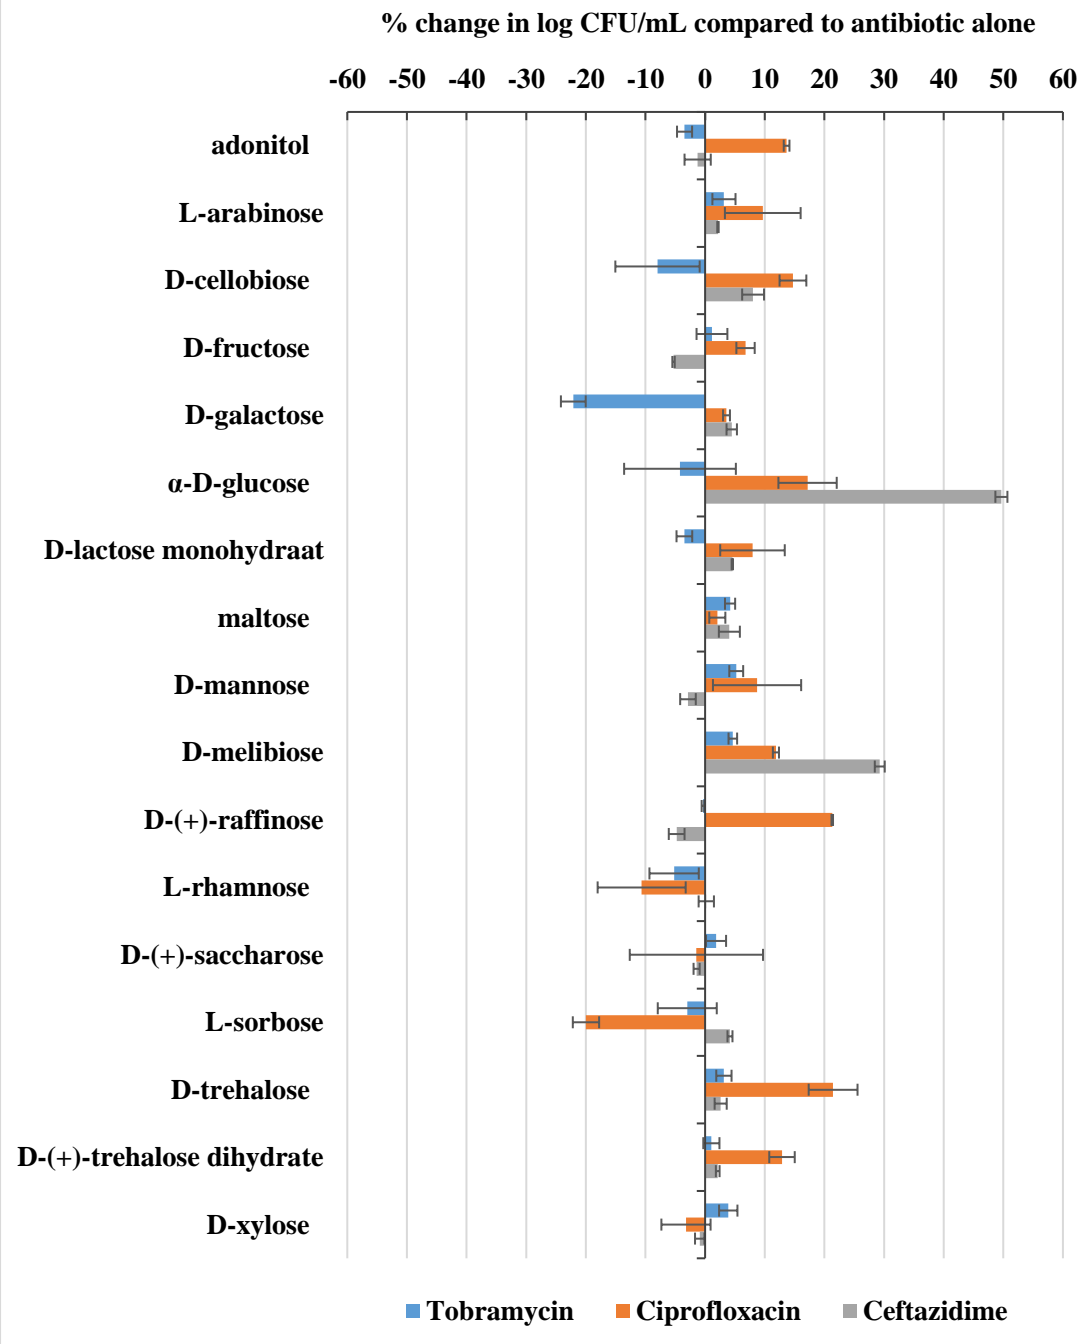

Figure S2. Percentage change in log (CFU/mL) of *P. aeruginosa* PAO1 treated with antibiotic + carbohydrates (delivering 60 mM final carbon) compared to treatment with antibiotic alone. Antibiotics used: 2.50  $\mu$ g/mL tobramycin, 0.30  $\mu$ g/mL ciprofloxacin or 1.57  $\mu$ g/mL ceftazidime. Data shown are the mean of three technical replicates. Error bar indicates standard error.

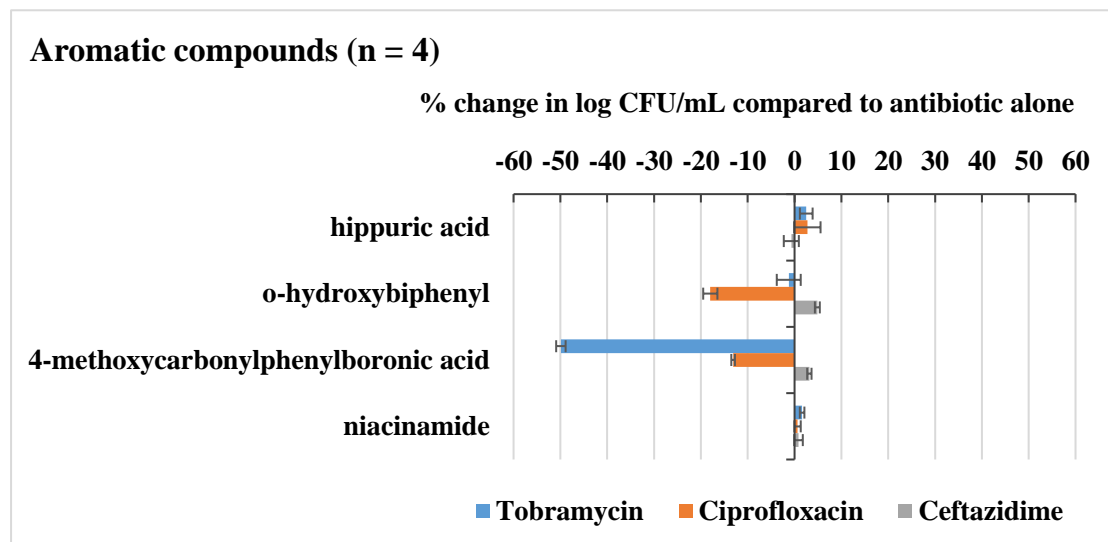

**Figure S3.** Percentage change in log (CFU/mL) of *P. aeruginosa* PAO1 treated with antibiotic + aromatic compounds (delivering 60 mM final carbon) compared to treatment with antibiotic alone. Antibiotics used: 2.50  $\mu\text{g/mL}$  tobramycin, 0.30  $\mu\text{g/mL}$  ciprofloxacin or 1.57  $\mu\text{g/mL}$  ceftazidime. Data shown are the mean of three technical replicates. Error bar indicates standard error.

### Organic acids and organic acid salts (n = 23)

% change in log CFU/mL compared to antibiotic alone

-60 -50 -40 -30 -20 -10 0 10 20 30 40 50 60

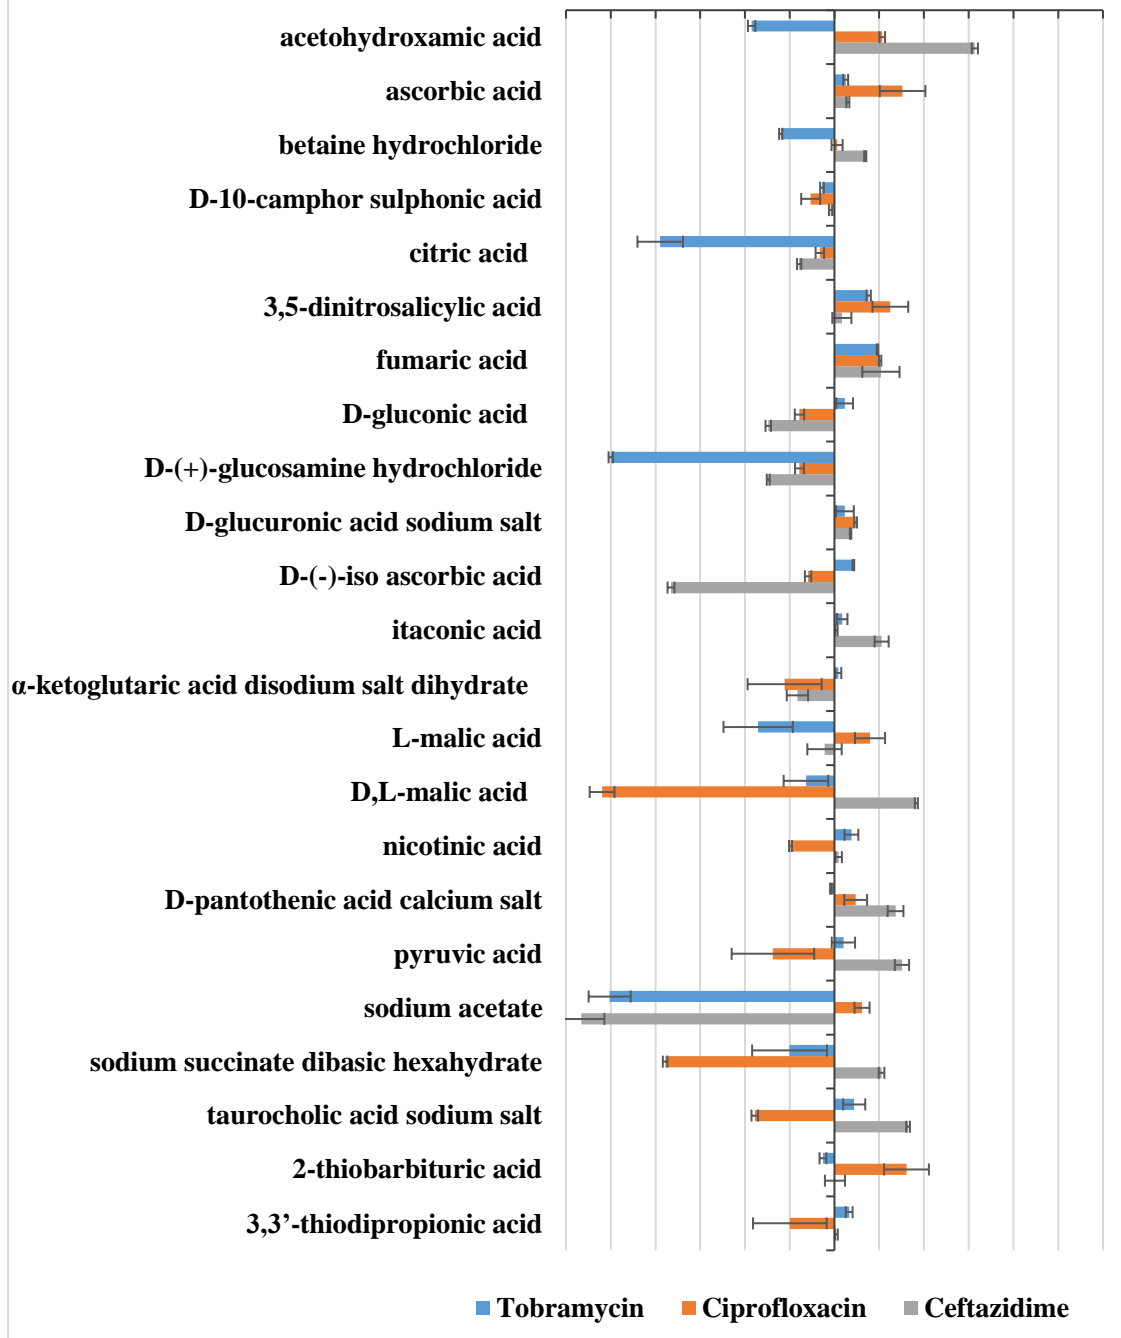

Figure S4. Percentage change in log (CFU/mL) of *P. aeruginosa* PAO1 treated with antibiotic + organic acid or organic acid salts (delivering 60 mM final carbon) compared to treatment with antibiotic alone. Antibiotics used: 2.50  $\mu$ g/mL tobramycin, 0.30  $\mu$ g/mL ciprofloxacin or 1.57  $\mu$ g/mL ceftazidime. Data shown are the mean of three technical replicates. Error bar indicates standard error.

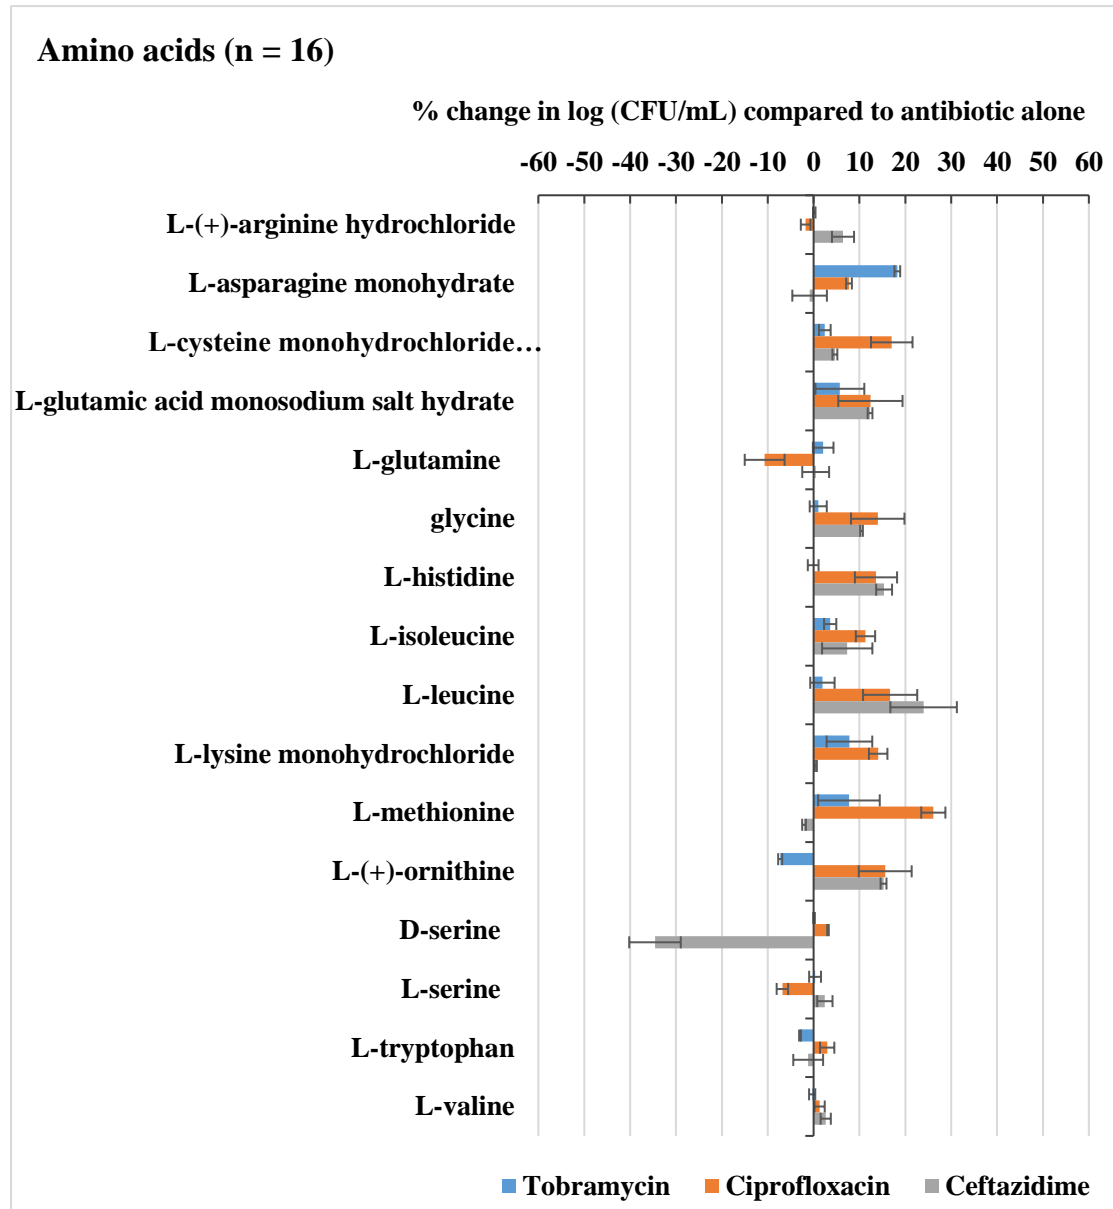

**Figure S5.** Percentage change in log (CFU/mL) of *P. aeruginosa* PAO1 treated with antibiotic + amino acids (delivering 60 mM final carbon) compared to treatment with antibiotic alone. Antibiotics used: 2.50 µg/mL tobramycin, 0.30 µg/mL ciprofloxacin or 1.57 µg/mL ceftazidime. Data shown are the mean of three technical replicates. Error bar indicates standard error.

### Alcohols (n = 4)

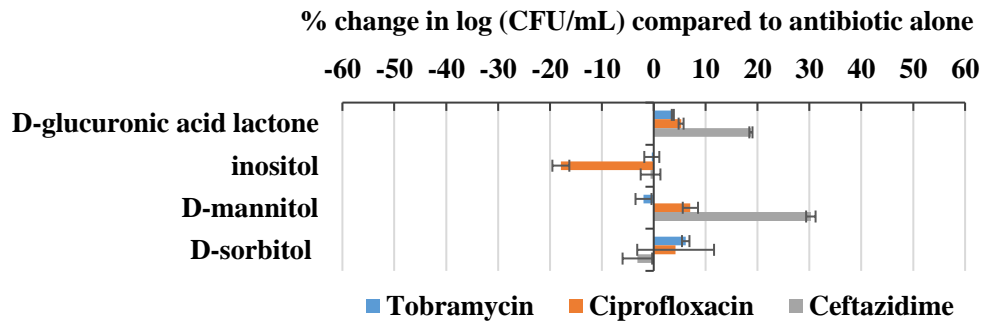

**Figure S6.** Percentage change in log (CFU/mL) of *P. aeruginosa* PAO1 treated with antibiotic + alcohols (delivering 60 mM final carbon) compared to treatment with antibiotic alone. Antibiotics used: 2.50  $\mu\text{g}/\text{mL}$  tobramycin, 0.30  $\mu\text{g}/\text{mL}$  ciprofloxacin or 1.57  $\mu\text{g}/\text{mL}$  ceftazidime. Data shown are the mean of three technical replicates. Error bar indicates standard error.

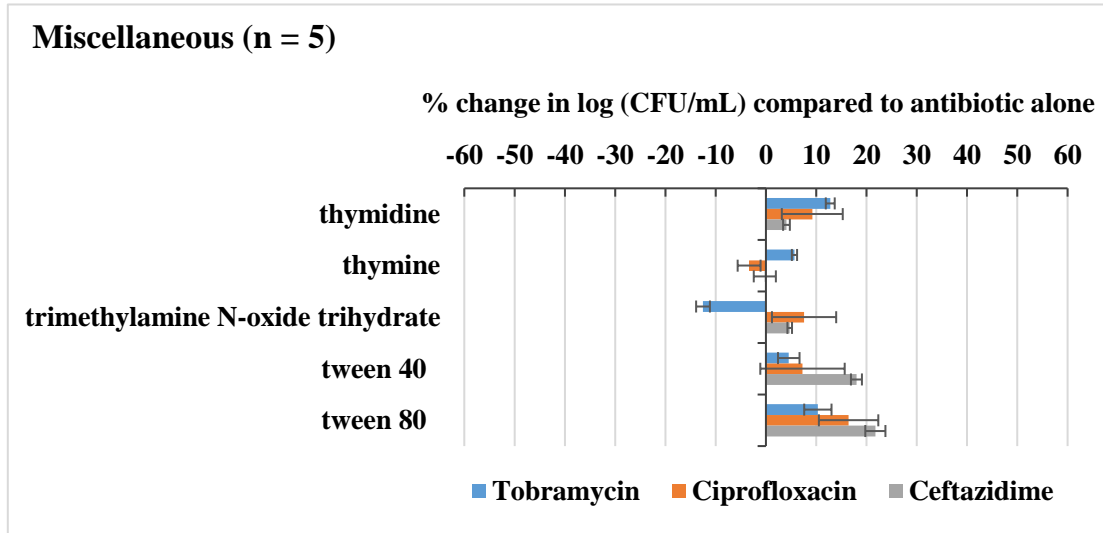

**Figure S7.** Percentage change in log (CFU/mL) of *P. aeruginosa* PAO1 treated with antibiotic + miscellaneous carbon sources (delivering 60 mM final carbon) compared to treatment with antibiotic alone. Antibiotics used: 2.50 µg/mL tobramycin, 0.30 µg/mL ciprofloxacin or 1.57 µg/mL ceftazidime. Data shown are the mean of three technical replicates. Error bar indicates standard error.

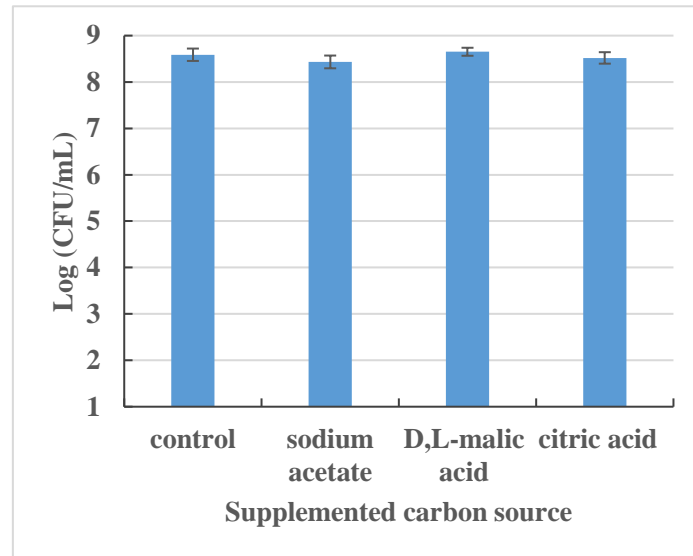

**Figure S8. Effect of 30 mM sodium acetate, 15 mM D,L-malic acid, and 10 mM citric acid on *P. aeruginosa* PAO1 biofilm formation in SCFM2. Values shown are the mean (n = 3). Error bars indicate standard error.**



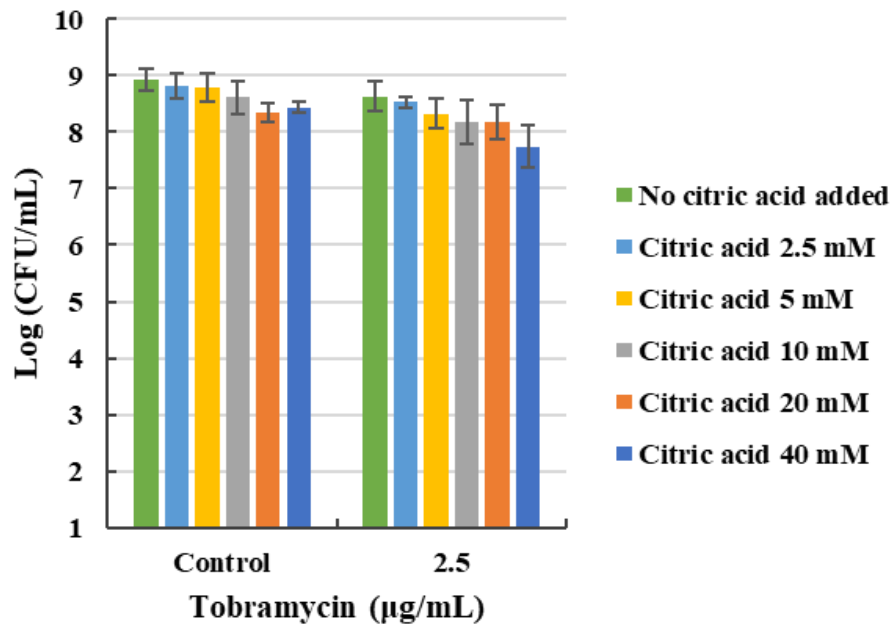

**Figure S9.** Effect of different combinations of citric acid and tobramycin on eradication of *P. aeruginosa* PAO1 biofilms. Values shown are the mean (n = 4). Error bars indicate standard error.
